# Supplementary material for: MGACA-Net: a novel deep learning based multi-scale guided attention and context aggregation for localization of knee anterior cruciate ligament tears region in MRI images
Source: PeerJ journal article supplement (doi:10.7717/peerj-cs.1483), 2023-07-13

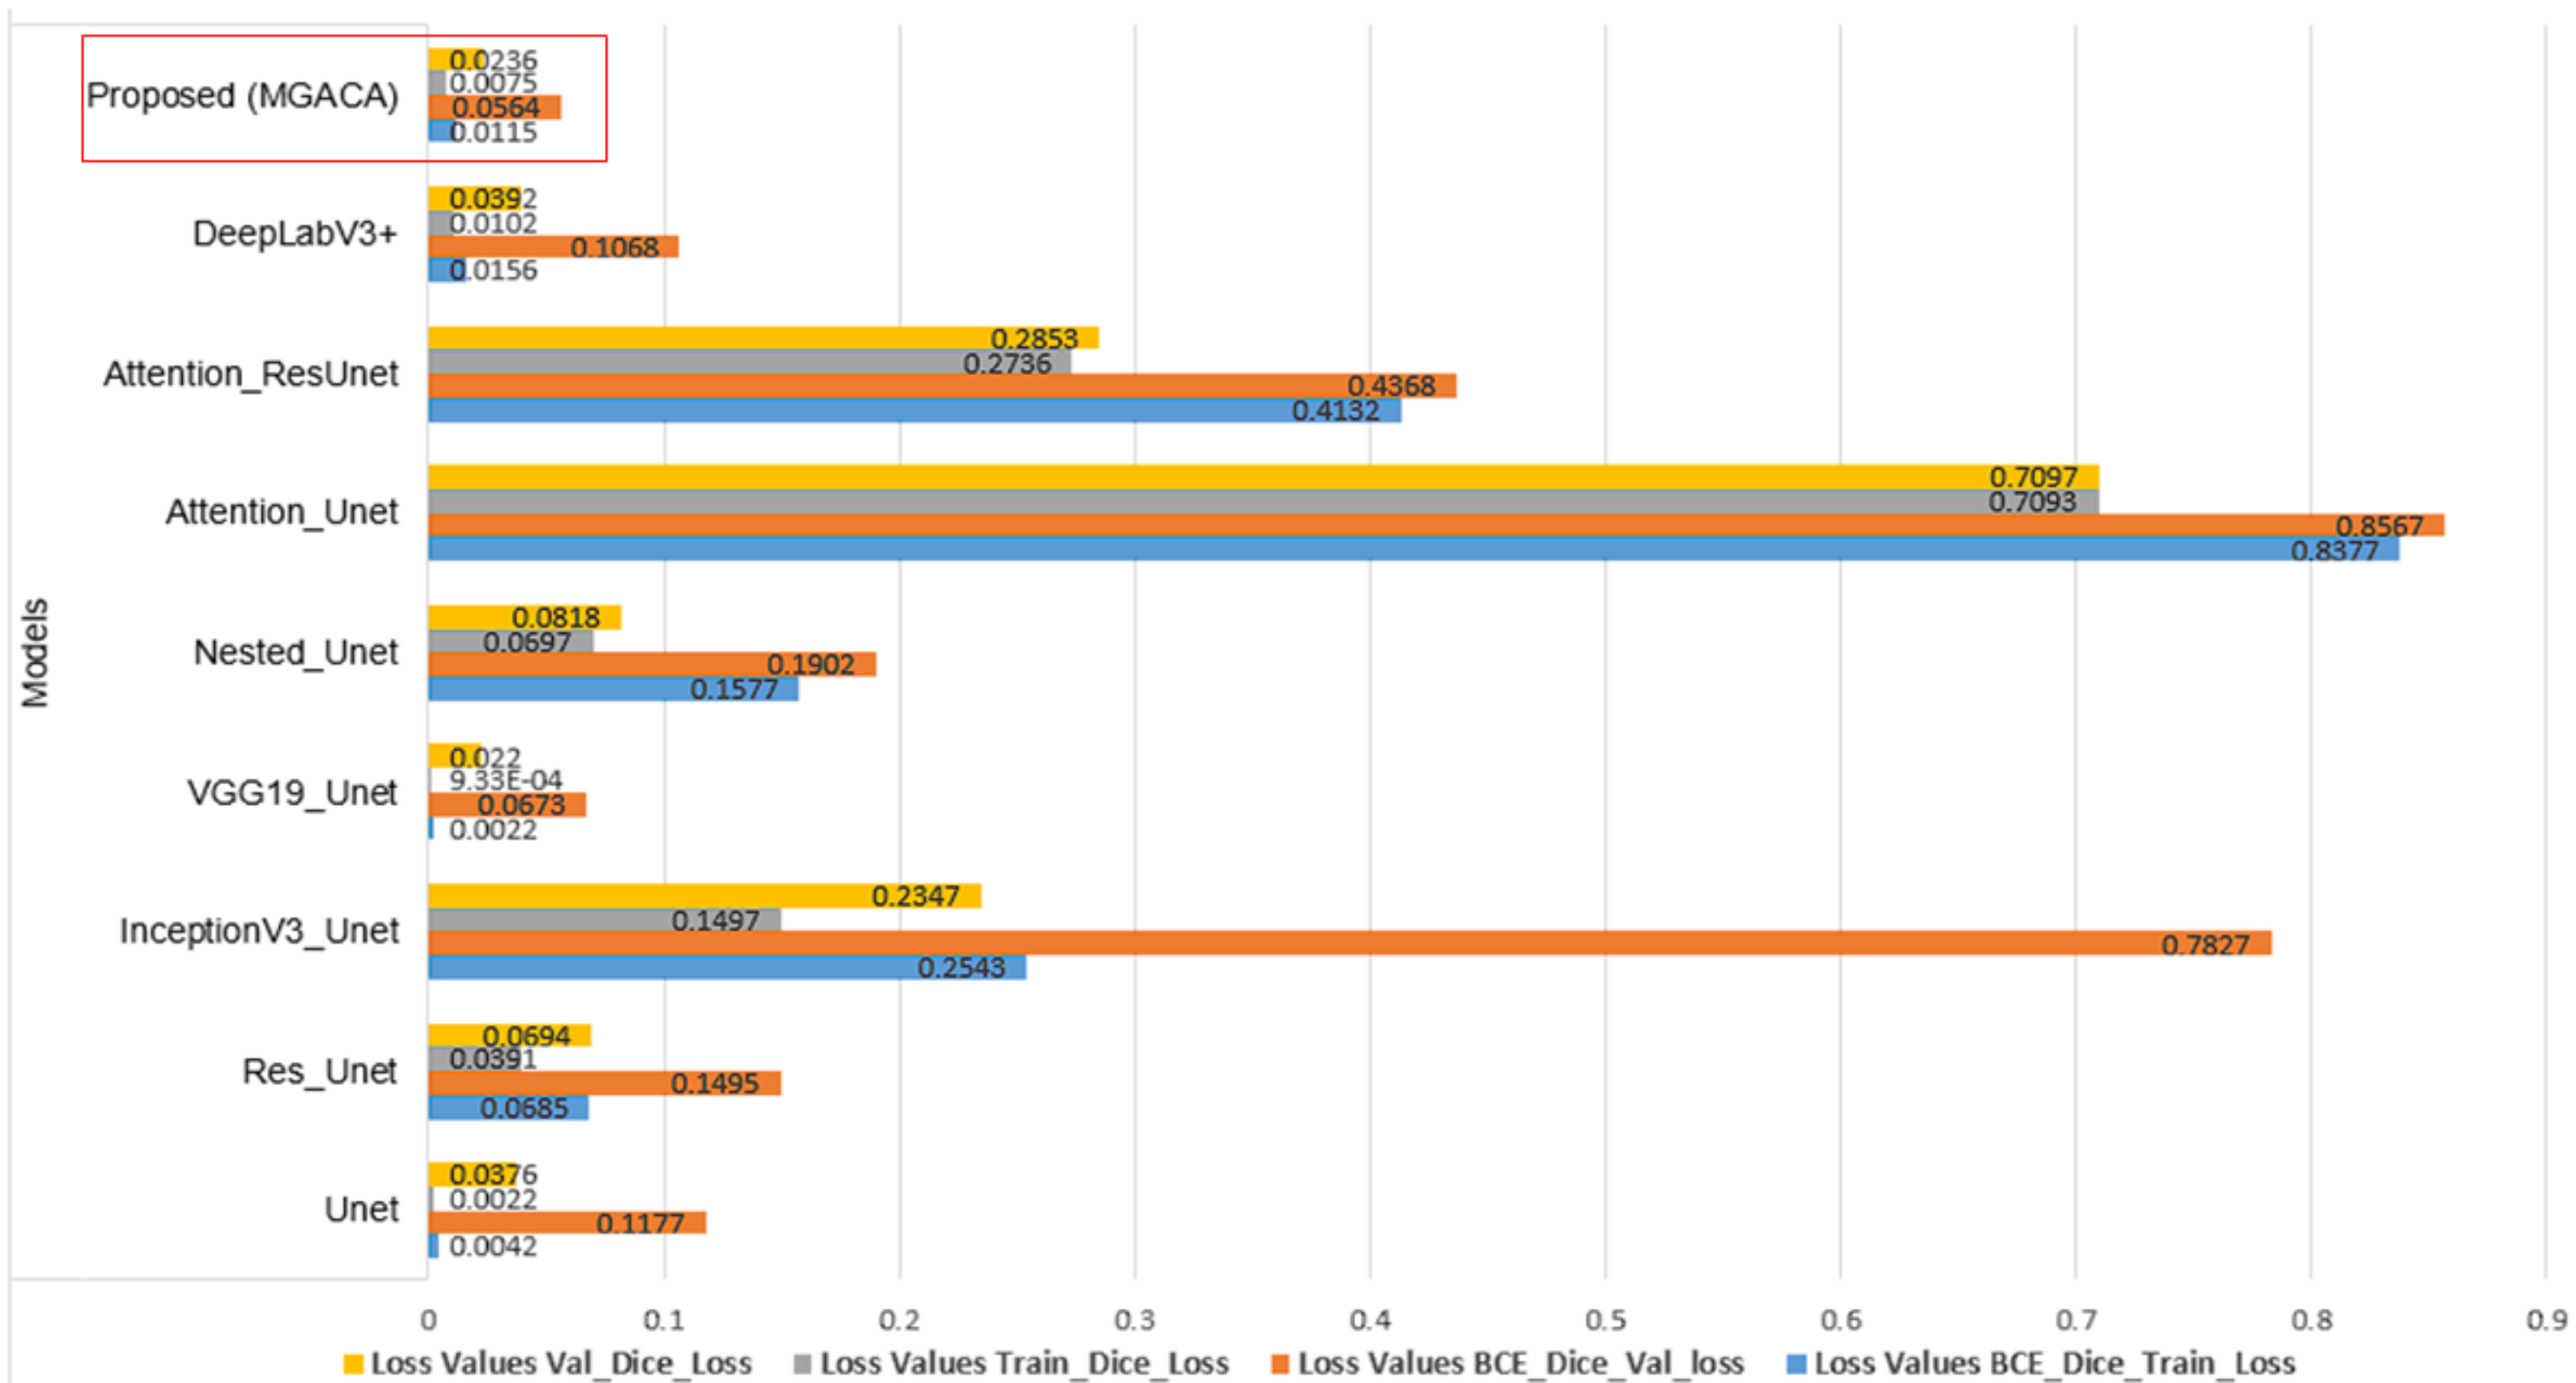

Supplement: Figure_S3.pdf [file Figure_S3.pdf]
